# Supplementary material
Source: publisher figshare collection journal article supplement (https://asha.figshare.com/articles/dataset/_/8061740)
Supplement: Supplementary file 1 [file 1]

**Supplemental Material S2.** Average formant values for each vowel, task, and condition (Hz). The delta columns show the difference between normal (N) and loud (L) conditions.

| Task    | Vowel | F1  |      |       | F2   |      |       |
|---------|-------|-----|------|-------|------|------|-------|
|         |       | N   | L    | Delta | N    | L    | Delta |
| Reading | i:    | 314 | 345  | 31    | 2666 | 2665 | -1    |
|         | a:    | 826 | 932  | 106   | 1438 | 1478 | 40    |
|         | u:    | 334 | 390  | 56    | 648  | 741  | 93    |
| Q-A     | i:    | 321 | 332  | 11    | 2562 | 2557 | -5    |
|         | a:    | 911 | 1029 | 118   | 1448 | 1491 | 43    |
|         | u:    | 355 | 380  | 25    | 901  | 921  | 20    |
| Pizza   | i:    | 333 | 359  | 26    | 2256 | 2297 | 41    |
|         | a:    | 810 | 871  | 61    | 1496 | 1552 | 56    |
|         | u:    | 344 | 381  | 37    | 842  | 991  | 149   |
