# Supplementary material
Source: publisher figshare collection journal article supplement (https://asha.figshare.com/articles/dataset/_/8061740)
Supplement: Supplementary file 2 [file 1]

## **Supplemental Material S4. Recipe text.**

All recipes had this preamble:

Sie sollen für eine große Feier eine Pizza zubereiten. Die Zubereitung ist diesmal etwas ganz besonderes und sie haben eine Gehilfin bekommen, die Ihnen beim Kochen helfen soll. Erklären Sie bitte Ihrer Gehilfin die einzelnen Schritte des Zubereitens und welche Zutaten dafür gebraucht werden.

You need to prepare a pizza for a big party. The preparation is very special this time and you have a helper to help you with the cooking. Please explain to your assistant all steps of preparation and which ingredients are needed.

| Die ZAS-Pizza                                                                                                                                                                                                                                                                                                                            | The ZAS-Pizza [ZAS = Zentrum für Allgemeine Sprachwissenschaft, Centre for General Linguistics]                                                                                                                                                                                                                              |
|------------------------------------------------------------------------------------------------------------------------------------------------------------------------------------------------------------------------------------------------------------------------------------------------------------------------------------------|------------------------------------------------------------------------------------------------------------------------------------------------------------------------------------------------------------------------------------------------------------------------------------------------------------------------------|
| <p>Als erstes bereiten Sie den Teig vor. Da die ZAS Pizza groß werden soll, benötigen Sie dafür 1 kg Mehl, Salz, Wasser und Hefe. Daraus kneten Sie einen weichen Teig, den Sie ca. 30 min an einer warmen Stelle stehen und gehen lassen. Ist der Teig gut, dann rollen Sie ihn zu einer 1 cm dicken Schicht aus.</p>                   | <p>First prepare the dough. Since the ZAS pizza is supposed to be big, you will need 1 kg of flour, salt, water and yeast. From this, knead a soft dough, which you can let stand for about 30 minutes in a warm place. If the dough is good, roll it out to a 1 cm thick layer.</p>                                         |
| <p>Dann wird auf den Teig eine feine Soße aufgetragen – eine Tomatensoße mit Knoblauch. Der Knoblauch soll frisch sein und klein zerhackt werden. Er wird mit der pürierten Tomatensoße vermischt und danach soll die Soße dünn auf den Teig gestrichen werden.</p>                                                                      | <p>Then apply a fine sauce to the dough – a tomato sauce with garlic. The garlic should be fresh and chopped up small. It is mixed with the pureed tomato sauce and then the sauce should be spread thinly on the dough.</p>                                                                                                 |
| <p>Für den Belag benötigen Sie diverse Gemüse, die in Kreisform angeordnet werden sollen. Da das ZAS Logo besonders viele Rot- und Weißtöne enthält, sollen auch besonders viele dieser Farben verwendet werden. Dazu zählen Paprika, Tomate, Ziegenkäse und Aubergine. Alle Dinge werden natürlich vorher klein geschnitten.</p>        | <p>For the topping you need various vegetables that are to be arranged in a circle. Since the ZAS logo contains a particularly large number of reds and whites, many of these colors specifically should be used. These include peppers, tomato, goat's cheese and eggplant. Of course, all things are cut small before.</p> |
| <p>Die Pizza kann nun ca. 45 Minuten im Backofen gebacken werden. In der Zwischenzeit soll noch eine kleine zusätzliche Attraktion vorbereitet werden. In die Mitte der Pizza soll ein kleiner Kuchen beigefügt werden, der obendrauf das ZAS Logo enthält. Den bereiten Sie mit einem Pudding, Gelatine und Lebensmittelfarben vor.</p> | <p>The pizza can now be baked in the oven for about 45 minutes. In the meantime, a small additional attraction should be prepared. In the middle of the pizza a small cake is to be attached, on top of which is the ZAS logo. You prepare this with pudding, gelatin and food colors.</p>                                   |
| <p>Gutes Gelingen!</p>                                                                                                                                                                                                                                                                                                                   | <p>Good luck!</p>                                                                                                                                                                                                                                                                                                            |

| Die HU-Pizza                                                                                                                                                                                                                                                                                                                                                                                                                                                                                                                                     | The HU Pizza [HU = Humboldt-University]                                                                                                                                                                                                                                                                                                                                                                                                                                    |
|--------------------------------------------------------------------------------------------------------------------------------------------------------------------------------------------------------------------------------------------------------------------------------------------------------------------------------------------------------------------------------------------------------------------------------------------------------------------------------------------------------------------------------------------------|----------------------------------------------------------------------------------------------------------------------------------------------------------------------------------------------------------------------------------------------------------------------------------------------------------------------------------------------------------------------------------------------------------------------------------------------------------------------------|
| <p>Als erstes bereiten Sie wieder den Teig vor. Diesmal benötigen Sie 2 kg Mehl, drei Esslöffel Salz, Wasser und Hefe. Die HU Pizza muss größer sein als die ZAS Pizza, denn die Humboldt Universität hat mehr Angestellte und StudentInnen. Sie kneten einen weichen Teig, den Sie ca. 30 min an einer warmen Stelle stehen und gehen lassen. Ist der Teig gut, dann rollen Sie ihn zu einer 0.5 cm dicken Schicht aus. Der Teig wird sehr groß und dünn sein, daher brauchen Sie ein speziell angefertigtes Blech und einen Steinbackofen.</p> | <p>First prepare the dough again. This time you need 2 kg of flour, three tablespoons of salt, water and yeast. The HU Pizza must be bigger than the ZAS Pizza, because the Humboldt University has more employees and students. You knead a soft dough, which you let stand for about 30 minutes in a warm place. If the dough is good, roll it out to a 0.5 cm thick layer. The dough will be very large and thin, so you need a custom made sheet and a stone oven.</p> |
| <p>Als Soße verwenden Sie diesmal Quark, der etwas mit Milch verdünnt wird. Sie sollten für den großen Teig ca. 5 kg Quark und 2 Liter Milch zur Verfügung haben, eventuell wird aber auch etwas weniger benötigt.</p>                                                                                                                                                                                                                                                                                                                           | <p>As a sauce, use quark this time, which is diluted with milk. For the large amount of dough you should have about 5 kg quark and 2 liters of milk available, but it may be that ultimately you need a bit less.</p>                                                                                                                                                                                                                                                      |
| <p>Der Belag auf der Pizza soll ein wahres Kunstwerk darstellen. Daher sind hier ihre Schnitzkünste gefragt. Aus den grünen Schalen von Gurken soll das Humboldt Eingangsgebäude nachgestaltet werden. Daher suchen Sie sich bitte beim Einkauf besonders lange, schlanke Gurken aus. Die vor dem Eingangsgebäude stehenden Bäume sollen mit Broccoli nachgebildet werden.</p>                                                                                                                                                                   | <p>The topping on the pizza should be a true work of art. Therefore, your carving skills are in demand here. From the green peels of cucumbers, the Humboldt entrance building should be recreated. Thus, please look for extra long, slender cucumbers when shopping. The trees in front of the entrance building are to be reproduced with broccoli.</p>                                                                                                                 |
| <p>Die Pizza soll nur 15 Minuten im Steinbackofen gebacken werden. Bitte garnieren Sie nach dem Herausholen die Pizza noch mit etwas Parmesan Käse.</p>                                                                                                                                                                                                                                                                                                                                                                                          | <p>The pizza should be baked only 15 minutes in the stone oven. Please garnish the pizza with some Parmesan cheese after removing it.</p>                                                                                                                                                                                                                                                                                                                                  |
| <p>Gutes Gelingen!</p>                                                                                                                                                                                                                                                                                                                                                                                                                                                                                                                           | <p>Good luck!</p>                                                                                                                                                                                                                                                                                                                                                                                                                                                          |

| Die ZFL-Pizza                                                                                                                                                                                                                                                                                                                                                                                                                                                              | The ZFL-Pizza [ZFL = Zentrum für Literaturforschung, Centre for Literature Research]                                                                                                                                                                                                                                                                                                                               |
|----------------------------------------------------------------------------------------------------------------------------------------------------------------------------------------------------------------------------------------------------------------------------------------------------------------------------------------------------------------------------------------------------------------------------------------------------------------------------|--------------------------------------------------------------------------------------------------------------------------------------------------------------------------------------------------------------------------------------------------------------------------------------------------------------------------------------------------------------------------------------------------------------------|
| <p>Die ZFL Pizza ist eine süße Pizza, wie das ZFL. Als erstes bereiten Sie den Teig vor. Sie benötigen dafür 1 kg Mehl, Zucker, Wasser und Hefe. Daraus kneten Sie ca. 10 Minuten lang einen weichen Teig, den Sie ca. 30 min an einer warmen Stelle stehen und lassen. Fügen Sie dem Teig außerdem etwas Zimt bei, dann riecht er lecker. Formen Sie dann lange dünne Würste aus dem Teig, die Sie wie eine Schnecke zusammenrollen und dann kurz im Backofen backen.</p> | <p>The ZFL Pizza is a sweet pizza, like the ZFL. First prepare the dough. You will need 1 kg of flour, sugar, water and yeast. From this, knead a soft dough for about 10 minutes, leaving it in a warm place for about 30 minutes. Add some cinnamon to the dough so that it smells delicious. Then make long thin sausages from the dough, which you roll up like a snail and then bake briefly in the oven.</p> |
| <p>Auf den Teig wird eine Schicht Vanillepudding aufgetragen, der mit echten Vanillestückchen gekocht wird. Der Pudding wird also mit Milch, Puddingpulver, Vanillestückchen und Honig auf dem Herd gekocht und danach nur sehr dünn auf den Teig gestrichen.</p>                                                                                                                                                                                                          | <p>A layer of vanilla pudding is applied to the dough, which is cooked with real pieces of vanilla. The pudding is cooked with milk, custard powder, vanilla pieces and honey on the stove and then only very thinly spread on the dough.</p>                                                                                                                                                                      |
| <p>Für den Belag sollen viele Obstsorten mit bunten Farben ausgewählt werden. Zum Beispiel Bananen, Erdbeeren, Johannisbeeren, Apfelstücke, Pfirsiche, Kirschen, Ananas, Kiwi und Pflaumen. Die Früchte werden gewaschen, abgetropft und dann in kleine Würfel geschnitten und in Blumenform auf dem Teig angeordnet.</p>                                                                                                                                                  | <p>For the topping many fruits are to be selected with colorful colors. For example, bananas, strawberries, currants, apple pieces, peaches, cherries, pineapple, kiwi and plums. The fruits are washed, drained and then cut into small cubes and arranged in flower form on the dough.</p>                                                                                                                       |
| <p>Zum Schluss sollen noch kleine Sahnehäubchen auf die Früchte aufgetragen werden. Dazu wird Schlagsahne mit Sahnesteif vermischt und kurz zu Sahne geschlagen. Ihrer Kreativität soll bei dieser Pizza keine Grenzen gestellt werden.</p>                                                                                                                                                                                                                                | <p>Finally, a little icing on the fruit should be applied. For this, whipped cream is mixed with cream stabilizer and whipped briefly into a cream. For this pizza your creativity should have no limits.</p>                                                                                                                                                                                                      |
| <p>Gutes Gelingen!</p>                                                                                                                                                                                                                                                                                                                                                                                                                                                     | <p>Good luck!</p>                                                                                                                                                                                                                                                                                                                                                                                                  |

| Die FU-Pizza                                                                                                                                                                                                                                                                                                                                                                                                                                                   | The FU-Pizza [FU = Free University]                                                                                                                                                                                                                                                                                                                                        |
|----------------------------------------------------------------------------------------------------------------------------------------------------------------------------------------------------------------------------------------------------------------------------------------------------------------------------------------------------------------------------------------------------------------------------------------------------------------|----------------------------------------------------------------------------------------------------------------------------------------------------------------------------------------------------------------------------------------------------------------------------------------------------------------------------------------------------------------------------|
| <p>Die FU Pizza ist eine große Pizza mit verschiedenen Fischen und Meeresfrüchten. Als erstes bereiten Sie den Teig vor. Sie benötigen dafür 2 kg Mehl, Salz, Wasser und Hefe. Aus den Zutaten kneten Sie einen weichen Teig und lassen ihn eine Weile gehen. Rollen Sie dann den Teig aus und ritzen wellenförmige Muster – wie Wasser – in den Teig ein.</p>                                                                                                 | <p>The FU Pizza is a big pizza with different fish and seafood. First prepare the dough. You will need 2 kg of flour, salt, water and yeast. From the ingredients knead a soft dough and let it sit for a while. Then roll out the dough and scrape wavy patterns – like water – into the dough.</p>                                                                       |
| <p>Die Soße auf dem Teig sollte so wie das Wasser eine blaue Farbe enthalten. Dafür wird eine größere Anzahl an Blaubeeren benutzt. Bitte pürieren Sie diese zu einer dickflüssigen Soße. Diese Soße soll möglichst dünn mit einem Löffel auf den Teig aufgetragen werden.</p>                                                                                                                                                                                 | <p>The sauce on the dough should have a blue color like the water. For this a large amount of blueberries is used. Please puree them to a thick sauce. This sauce should be applied as thinly as possible to the dough with a spoon.</p>                                                                                                                                   |
| <p>Danach folgen die Hauptzutaten. Sie sollen den Eindruck des Meeres vermitteln. Legen Sie daher Garnelen, Muscheln, Meeresfrüchte, Tintenfisch und viele andere Fischarten auf die Pizza. Besonders attraktiv sind kleine Sardinen, die sie als Ganzes auf die Pizza legen können. Auf dem Meeresboden werden Algen ausgelegt, die Sie in asiatischen Geschäften kaufen können und kleingeschnittene Möhren sollen den Eindruck von Korallen vermitteln.</p> | <p>Now come the main ingredients. They should convey the impression of the sea. So put shrimp, clams, seafood, octopus and many other types of fish on the pizza. Especially attractive are small sardines that can be put on the pizza whole. On the seabed is laid out seaweed, which you can buy in Asian shops, and chopped carrots give the impression of corals.</p> |
| <p>Um der Pizza noch eine besondere Note zu geben, soll in der Mitte ein Schiff dargestellt werden. Dazu benutzen Sie bitte möglichst große und lange Peperoni. Die Pizza wird danach für ca. 30 Minuten im Backofen gebacken.</p>                                                                                                                                                                                                                             | <p>To give the pizza a special touch, a ship should be displayed in the middle. For this, please use the largest, longest hot peppers possible. The pizza is then baked in the oven for about 30 minutes.</p>                                                                                                                                                              |
| <p>Gutes Gelingen!</p>                                                                                                                                                                                                                                                                                                                                                                                                                                         | <p>Good luck!</p>                                                                                                                                                                                                                                                                                                                                                          |
