# Supplementary material
Source: publisher figshare collection journal article supplement (https://asha.figshare.com/articles/dataset/_/8061740)
Supplement: Supplementary file 4 [file 1]

**Supplemental Material S1.** Number of productions for each speaker (s1–s11), loudness condition (N = normal; L = loud), and task.

| Speaker | Reading |    | Q-A |    | Pizza |    |
|---------|---------|----|-----|----|-------|----|
|         | N       | L  | N   | L  | N     | L  |
| s1      | 31      | 56 | 82  | 80 | 39    | 40 |
| s2      | 27      | 30 | 82  | 80 | 36    | 38 |
| s3      | 29      | 28 | 81  | 80 | 31    | 32 |
| s4      | 30      | 32 | 80  | 77 | 32    | 31 |
| s5      | 24      | 30 | 81  | 29 | 48    | 41 |
| s6      | 30      | 29 | 79  | 81 | 23    | 28 |
| s7      | 30      | 30 | 81  | 80 | 34    | 30 |
| s8      | 32      | 30 | 80  | 81 | 20    | 21 |
| s9      | 29      | 30 | 79  | 61 | 37    | 32 |
| s10     | 30      | 30 | 89  | 80 | 48    | 30 |
| s11     | 28      | 29 | 76  | 80 | 38    | 28 |
