# Supplementary material
Source: publisher figshare collection journal article supplement (https://asha.figshare.com/articles/dataset/_/8061740)

### Supplemental Material S3. F2 and overall intensity.

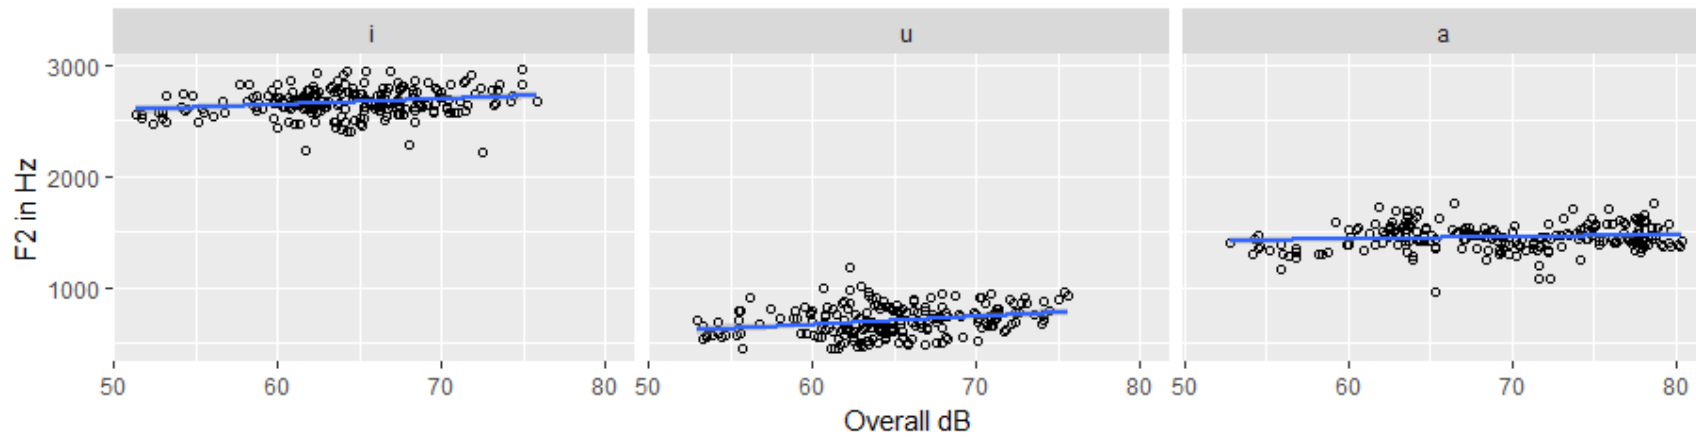

### Reading

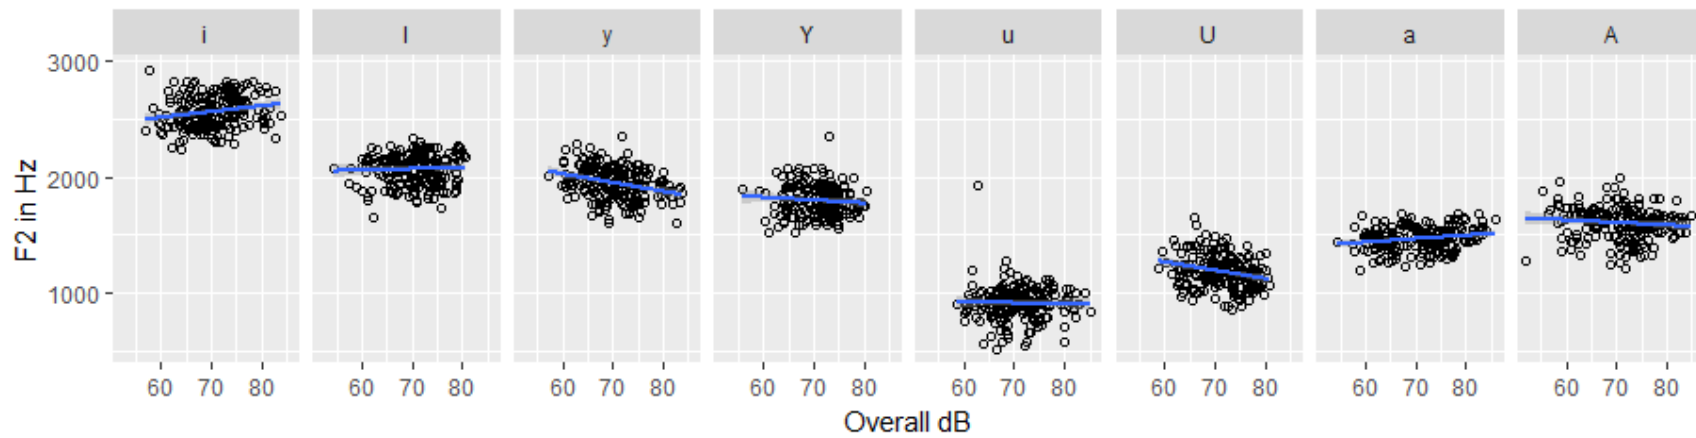

### Question–Answer

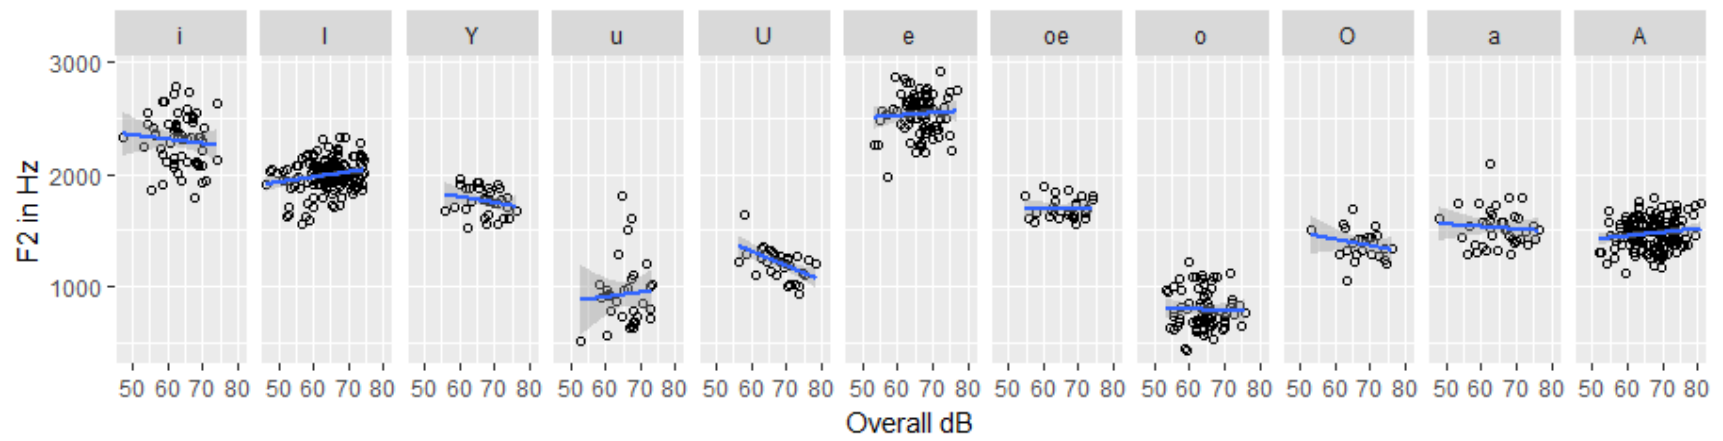

Pizza

Supplement: Supplementary file 3 [file 1]
